# Supplementary material for: Multiparametric Magnetic Resonance Imaging Grades the Aggressiveness of Prostate Cancer
Source: MDPI journal article supplement (doi:10.3390/cancers14071828), 2022-04-05
Supplement: s1 [file s1]

**Table S1.** Characteristics of the study population of men with suspected PCa according to the pathology findings of benign tissue, iPCa, and csPCa in prostate biopsies.

| Characteristic                               | Benign tissue    | iPCa             | csPCa            | pValue <sup>1</sup> | pValue <sup>2</sup> |
|----------------------------------------------|------------------|------------------|------------------|---------------------|---------------------|
| Number of cases                              | 794 (53.4)       | 145 (9.8)        | 547 (36.8)       | -                   | -                   |
| Median age, years (IQR)                      | 66 (61-72)       | 69 (63-73)       | 72 (66-76)       | =0.021              | <0.001              |
| Median total PSA, ng/mL (IQR)                | 5.6 (4.2-7.7)    | 4.8 (3.9-6.8)    | 7.3 (5.0-12.4)   | =0.008              | <0.001              |
| Abnormal DRE, n (%)                          | 96 (12.1)        | 20 (13.8)        | 213 (38.9)       | =0.583              | <0.001              |
| Median prostate volume, mL (IQR)             | 65 (48-86)       | 52 (40-73)       | 45 (34-59)       | <0.001              | <0.001              |
| Median PSA density, ng/mL <sup>2</sup> (IQR) | 0.09 (0.07-0.16) | 0.09 (0.07-0.17) | 0.17 (0.12-0.34) | =0.469              | <0.001              |
| Repeat biopsy, n (%)                         | 239 (30.1)       | 32 (22.1)        | 117 (21.4)       | =0.473              | =0.910              |
| Family history of PCa, n (%)                 | 52 (6.5%)        | 12 (8.3)         | 63 (11.5)        | =0.558              | =0.296              |
| PI-RADS, n (%)                               |                  |                  |                  |                     |                     |
| 1-2                                          | 278 (35.0)       | 25 (8.3)         | 12 (2.2)         |                     |                     |
| 3                                            | 323 (40.7)       | 53 (36.6)        | 68 (12.4)        | <0.001              | <0.001              |
| 4                                            | 158 (19.9)       | 56 (38.6)        | 236 (43.1)       |                     |                     |
| 5                                            | 35 (4.4)         | 11 (7.6)         | 231 (42.2)       |                     |                     |

iPCa = insignificant prostate cancer; csPCa =clinically significant prostate cancer; IQR =interquartile range; PI-RADS =prostate imaging report and data system; p Value<sup>1</sup> =between benign tissue and iPCa; pValue<sup>2</sup> =between iPCa and csPCa.

**Table S2.** Binary logistic regression for the prediction of ISUP grade group  $\geq 3$  in prostate biopsies.

| Predictor                                          | Odds Ratio (95% CI) | p Value |
|----------------------------------------------------|---------------------|---------|
| Age, Ref. previous year                            | 1.031 (0.995-1.086) | =0.097  |
| PCa family history, Ref. no                        | 1.094 (0.451-2.650) | =0.843  |
| Type of biopsy, Ref. repeat                        | 0.904 (0.472-1.730) | =0.760  |
| PSA density, Ref. previous 0.01 ng/mL <sup>2</sup> | 2.693 (1.158-6.263) | =0.021  |
| PI-RADS, Ref. PI-RADS <3                           | 2.568 (1.767-3.733) | <0.001  |

PCa =prostate cancer; PSA =prostate-specific antigen; PI-RADS =prostate imaging-report data system; CI =confidence interval; Ref. =referenced to.

**Table S3.** Binary logistic regression for the prediction of high-risk localised PCa.

| Predictor                                     | Odds Ratio (95% CI) | p Value |
|-----------------------------------------------|---------------------|---------|
| Age, Ref. previous year                       | 1.069 (0.998-1.124) | =0.084  |
| PCa family history, Ref. no                   | 1.766 (0.437-7.142) | =0.425  |
| Type of biopsy, Ref. repeat                   | 1.164 (0.492-3.420) | =0.596  |
| PSA density, Ref. previous ng/mL <sup>2</sup> | 3.756 (1.731-8.832) | <0.001  |
| PI-RADS, Ref. PI-RADS <3                      | 1.859 (1.067-3.237) | =0.029  |

PCa =prostate cancer; PSA =prostate-specific antigen; PI-RADS =prostate imaging-report data system; CI =confidence interval; Ref. =referenced to.

**Table S4.** Binary logistic regression for the prediction of clinically advanced PCa.

| Predictor                                          | Odds Ratio (95% CI) | p Value |
|----------------------------------------------------|---------------------|---------|
| Age, Ref. previous year                            | 1.056 (0.995-1.120) | =0.073  |
| PCa family history, Ref. no                        | 1.321 (0.895-4.197) | =0.075  |
| Type of biopsy, Ref. repeat                        | 1.121 (0.432-2.321) | =0.697  |
| PSA density, Ref. previous 0.01 ng/mL <sup>2</sup> | 4.633 (1.828-7.741) | <0.001  |
| PI-RADS, Ref. PI-RADS <3                           | 1.784 (1.128-4.244) | =0.019  |

PCa =prostate cancer; PSA =prostate-specific antigen; PI-RADS =prostate imaging-report data system; CI =confidence interval; Ref. =referenced to.

**Table S5.** Binary logistic regression for the prediction of adverse favorable pathology in surgical specimens.

| Predictor                                     | Odds Ratio (95% CI) | p Value |
|-----------------------------------------------|---------------------|---------|
| Age, Ref. previous year                       | 1.009 (0.941-1.134) | =0.227  |
| PCa family history, Ref. no                   | 0.63 (0.154-2.864)  | =0.582  |
| Type of biopsy, Ref. repeat                   | 1.328 (0.377-4.680) | =0.260  |
| PSA density, Ref. previous ng/mL <sup>2</sup> | 1.270 (1.017-9.920) | =0.034  |
| PI-RADS, Ref. PI-RADS <3                      | 3.841 (1.395-8.318) | =0.005  |

PCa =prostate cancer; PSA =prostate-specific antigen; PI-RADS =prostate imaging-report data system; CI =confidence interval; Ref. =referenced to.

**Table S6.** Binary logistic regression for the generation of predictive model of ISUP grade group >3, based on PI-RADS score and PSA density.

| Predictor                                        | Odds Ratio (95% CI) | p Value |
|--------------------------------------------------|---------------------|---------|
| PI-RADS score, Ref. to previous one              | 3.363 (2.512-4.503) | <0.001  |
| PSA density, Ref. to previous ng/mL <sup>2</sup> | 1.983 (1.138-3.456) | =0.016  |

PI-RADS =prostate imaging-report data system; PSAD =prostate-specific antigen density; CI =confidence interval; Ref. =referenced to.

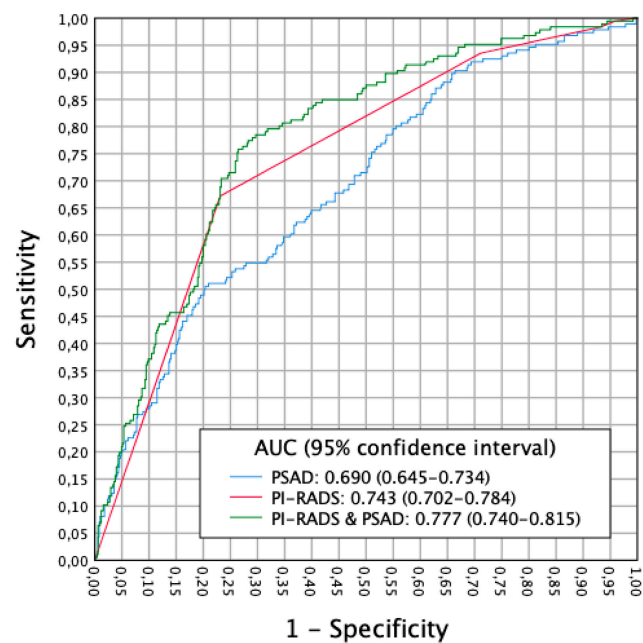

**Figure S1.** Receiver operation characteristic curves and areas under the curve of PI-RADS score, PSA density, and the model based on PI-RADS and PSA density, for the prediction of ISUP grade group >3 in prostate biopsies.
